# Supplementary material
Source: MDPI journal article supplement (https://www.mdpi.com/2305-6320/8/6/27)
Supplement: s1 [file s1]

# Supplementary Materials: Design, Syntheses and Bioevaluations of Some Novel $N^2$ -Acryloylbenzohydrazides as Chemostimulants and Cytotoxic Agents

Kinjal Lakhani, Edgar A. Borrego, Karla G. Cano, Jonathan R. Dimmock, Renato J. Aguilera, Swagatika Das, Praveen K. Roayapalley, Rajendra K. Sharma and Umashankar Das

## S1 Synthesis of the Esters 4a-m

A mixture of a substituted or unsubstituted benzoic acids 3a-m (0.0082 mol), ethanol (0.085 mol, 5 mL) and sulfuric acid (0.0094 mol, 0.5 mL) was heated under reflux for 6–8 h [1]. The reaction was monitored by TLC using a solvent system of hexane and ethyl acetate (1:1). In case of 4g and 4m, the esters precipitated from the reaction mixture. In other cases, the solvent was removed *in vacuo* to give the crude esters. All of the compounds were dissolved in ethyl acetate (20 mL) and washed twice with saturated sodium bicarbonate solution (20 mL). The organic phase was separated, washed with brine (20 mL) and dried over sodium sulfate. Removal of ethyl acetate yielded the desired esters. All the compounds in series 4 were identified by  $^1\text{H}$  NMR and the data for three representative compounds are given below. Table S1 indicates some physical data of these esters.

Ethyl benzoate (4a): Colorless liquid; Yield = 83%;  $^1\text{H}$  NMR ( $\text{CDCl}_3$ ):  $\delta$  8.08 (dd,  $J$  = 8.32 Hz, 1.31 Hz, 2H, Ar-H), 7.54 (m, 1H, Ar-H), 7.45 (m, 2H, Ar-H), 4.40 (q,  $J$  = 14.25 Hz, 7.12 Hz, 2H,  $\text{CH}_2$ ), 1.39 (t,  $J$  = 7.12 Hz,  $J$  = 14.23 Hz, 3H,  $\text{CH}_3$ ).

Ethyl 3,4-dichlorobenzoate (4g): Colorless crystals; Yield = 76%; m.p. 37 °C (lit. m.p. 35–37 °C) [2];  $^1\text{H}$  NMR ( $\text{CDCl}_3$ ):  $\delta$  8.12 (d,  $J$  = 1.92 Hz, 1H, Ar-H), 7.87 (dd,  $J$  = 8.36 Hz, 1.95 Hz, 1H, Ar-H), 7.52 (d,  $J$  = 8.38 Hz, 1H, Ar-H), 4.40 (q,  $J$  = 14.25 Hz, 7.16 Hz, 2H,  $\text{CH}_2$ ), 1.40 (t,  $J$  = 7.17 Hz,  $J$  = 14.33 Hz, 3H,  $\text{CH}_3$ ).

Ethyl 3,4-dimethoxybenzoate (4m): Colorless crystals; Yield = 71%; m.p. 42–44 °C (lit. m.p. 43–44 °C) [3];  $^1\text{H}$  NMR ( $\text{CDCl}_3$ ):  $\delta$  7.69 (dd,  $J$  = 8.42 Hz, 1.75 Hz, 1H, Ar-H), 7.55 (d,  $J$  = 1.63 Hz, 1H, Ar-H), 6.88 (d,  $J$  = 8.46 Hz, 1H, Ar-H), 4.36 (q,  $J$  = 14.28 Hz, 7.19 Hz, 2H,  $\text{CH}_2$ ), 3.94 (s, 6H, 2xOCH<sub>3</sub>), 1.39 (t,  $J$  = 7.13 Hz,  $J$  = 14.27 Hz, 3H,  $\text{CH}_3$ ).

**Table S1.** Some physical data of 4a-m.

| Compounds | Substituents | Appearance             | m.p. (°C) | Lit. m.p (°C) | Yield (%) |
|-----------|--------------|------------------------|-----------|---------------|-----------|
| 4a        | H            | Colorless liquid       | --        | --            | 83        |
| 4b        | 4-F          | Slightly yellow liquid | --        | --            | 76        |
| 4c        | 4-Br         | Slightly yellow liquid | --        | --            | 52        |
| 4d        | 4-Cl         | Colorless liquid       | --        | --            | 78        |
| 4e        | 2-Cl         | Slightly yellow liquid | --        | --            | 78        |

|    |                                      |                           |       |           |    |
|----|--------------------------------------|---------------------------|-------|-----------|----|
| 4f | 3-Cl                                 | Slightly yellow liquid    | --    | --        | 85 |
| 4g | 3,4-Cl <sub>2</sub>                  | Colorless solid crystals  | 37–39 | 35–37 [2] | 76 |
| 4h | 2,5-Cl <sub>2</sub>                  | Slightly red brown liquid | --    | --        | 75 |
| 4i | 3-CH <sub>3</sub>                    | Yellow liquid             | --    | --        | 73 |
| 4j | 2-CH <sub>3</sub>                    | Yellow liquid             | --    | --        | 81 |
| 4k | 4-CH <sub>3</sub>                    | Colorless liquid          | --    | --        | 89 |
| 4l | 4-OCH <sub>3</sub>                   | Slightly yellow liquid    | --    | --        | 86 |
| 4m | 3,4-(OCH <sub>3</sub> ) <sub>2</sub> | Colorless solid crystals  | 42–44 | 43–44[3]  | 71 |

## S2 Synthesis of the Hydrazides 5a-m

A solution of hydrazine hydrate in water (50–60%, 1.67 mL, 33.3 mmol) and a solution of the ethyl benzoate (1 g, 66.6 mmol) were mixed and then heated under reflux for 8–12 h [4]. The reaction was monitored by TLC using a solvent system of chloroform and methanol (9.5:0.5). After the reaction was completed, the solvents were removed *in vacuo* and the product recrystallized from ethanol (95%). These compounds have <sup>1</sup>H NMR spectra consistent with the structures proposed and the data for three representative compounds are given below. Some physical data for the compounds in series 5 are presented in Table S2.

Benzohydrazide (5a): Colourless crystals; Yield = 75%; m.p. 110 °C (lit. m.p. 112 °C) [1]; <sup>1</sup>H NMR (500 MHz, DMSO-*d*<sub>6</sub>) δ ppm 9.76 (s, 1H, CONH), 7.81 (d, J = 7.87 Hz, 2H, Ar-H), 7.51 (t, J = 6.9 Hz, J = 13.78 Hz, 1H, Ar-H), 7.44 (t, J = 7.6 Hz, J = 15.17 Hz, 2H, Ar-H), 4.48 (s, 2H, NH<sub>2</sub>).

3,4-Dichlorobenzohydrazide (5g): Colourless crystals; Yield = 93%; m.p. 167–170 °C (lit. m.p. 154–166 °C) [2]; <sup>1</sup>H NMR (500 MHz, DMSO-*d*<sub>6</sub>) δ ppm 9.96 (s, 1H, CONH), 8.04 (d, J = 1.94, 1H, Ar-H), 7.80 (dd, J = 8.37 Hz, 1.98 Hz, 1H), 7.74 (d, J = 8.36 Hz, 1H, Ar-H), 4.55 (s, 2H, Ar-H).

3,4-Dimethoxybenzohydrazide (5m): Colourless crystals; Yield = 91%; m.p. 148–150 °C (lit. m.p. 151–152 °C) [5]; <sup>1</sup>H NMR (500 MHz, DMSO-*d*<sub>6</sub>) δ ppm 9.63 (s, 1H, CONH), 7.43 (td, 2H, Ar-H), 7.00 (d, J = 8.38 Hz, 1H, Ar-H), 4.47 (s, 2H, Ar-H), 3.79 (d, J = 1.85 Hz, 6H, 2xOCH<sub>3</sub>).

Table S2. Physical data of 5a-m.

| Compounds | Substituents        | Appearance               | m.p. (°C) | Lit. m.p (°C) | Yield (%) |
|-----------|---------------------|--------------------------|-----------|---------------|-----------|
| 5a        | H                   | Colorless crystals       | 110–112   | 112 [1]       | 95        |
| 5b        | 4-F                 | Slightly yellow crystals | 160–162   | 162 [1]       | 69        |
| 5c        | 4-Br                | Colorless crystals       | 166–168   | 164 [1]       | 42        |
| 5d        | 4-Cl                | Colorless crystals       | 159–162   | 163 [1]       | 66        |
| 5e        | 2-Cl                | Colorless crystals       | 118–121   | 118–120 [6]   | 74        |
| 5f        | 3-Cl                | Colorless crystals       | 154–157   | 158 [1]       | 93        |
| 5g        | 3,4-Cl <sub>2</sub> | Colorless crystals       | 167–170   | 154–166 [2]   | 73        |
| 5h        | 2,5-Cl <sub>2</sub> | Colorless crystals       | 167–172   | 168–170 [2]   | 35        |

|    |                                      |                          |         |             |    |
|----|--------------------------------------|--------------------------|---------|-------------|----|
| 5i | 3-CH <sub>3</sub>                    | Colorless crystals       | 99–102  | 97 [1]      | 88 |
| 5j | 2-CH <sub>3</sub>                    | Colorless crystals       | 118–120 | 124 [1]     | 83 |
| 5k | 4-CH <sub>3</sub>                    | Yellow crystals          | 115–118 | 117 [1]     | 90 |
| 5l | 4-OCH <sub>3</sub>                   | Slightly yellow crystals | 134–136 | 136–140 [6] | 88 |
| 5m | 3,4-(OCH <sub>3</sub> ) <sub>2</sub> | Colorless crystals       | 148–150 | 151–152 [5] | 91 |

### S3 Some Physical Data of 2a-f

3,5-Bis(benzylidene)-4-piperidone 2a: Yield = 86%; m.p. 175–177 °C (lit. m.p. 177–178 °C) [7]; <sup>1</sup>H NMR (500 MHz, DMSO-*d*<sub>6</sub>) δ ppm 7.82 (brs, 2H, =CH), 7.40 (m, 10H, Ar-H), 4.16 (d, J = 1.73 Hz, 4H, piperidyl H). The NH peak was not observed.

3,5-Bis(4-Chlorobenzylidene)-4-piperidone 2b: Crude yield = 64%; <sup>1</sup>H NMR (500 MHz, DMSO-*d*<sub>6</sub>) δ ppm 7.55 (brs, 2H, =CH), 7.52 (s, 8H, Ar-H), 3.96 (d, J = 1.33, 4H, piperidyl H). The NH peak was not observed.

3,5-Bis(4-Fluorobenzylidene)-4-piperidone 2c: Crude yield = 40%; <sup>1</sup>H NMR (500 MHz, DMSO-*d*<sub>6</sub>) δ ppm 7.56 (d, J = 8.94 Hz, 6H (4H, Ar-H; 2H, =CH)), 7.30 (m, 4H, Ar-H), 3.96 (s, 4H, piperidyl H). The NH peak was not observed.

3,5-Bis(4-Nitrobenzylidene)-4-piperidone 2d: Crude yield = 94%; <sup>1</sup>H NMR (500 MHz, DMSO-*d*<sub>6</sub>) δ ppm 8.28 (d, J = 7.48 Hz, 4H, Ar-H), 7.76 (d, J = 7.57 Hz, 4H, Ar-H), 7.66 (s, 2H, =CH), 4.02 (s, 4H, piperidyl H). The NH peak was not observed.

3,5-Bis(4-Methoxybenzylidene)-4-piperidone 2e: Crude yield = 73%; <sup>1</sup>H NMR (500 MHz, DMSO-*d*<sub>6</sub>) δ ppm 7.53 (s, 2H, =CH), 7.44 (s, 4H, Ar-H), 7.02 (s, 4H, Ar-H), 3.96 (s, 4H, piperidyl H), 3.8 (s, 6H, 2xOCH<sub>3</sub>). The NH peak was not observed.

3,5-Bis(4-Methylbenzylidene)-4-piperidone 2f: Crude yield = 72%; <sup>1</sup>H NMR (500 MHz, DMSO-*d*<sub>6</sub>) δ ppm 7.66 (brs, 2H, =CH), 7.40 (d, 4H, J = 7.85 Hz, Ar-H), 7.30 (d, 4H, J = 7.77 Hz, Ar-H), 4.15 (s, 4H, piperidyl H), 2.35 (s, 3H, CH<sub>3</sub>). The NH peak was not observed.

### S4 Structures of Melphalan and 5-fluorouracil

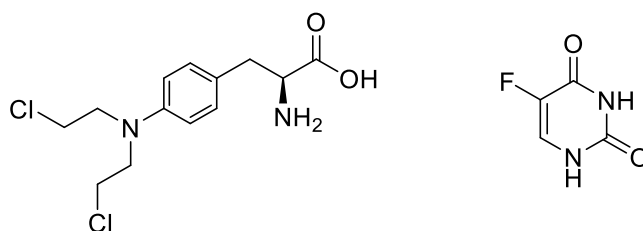

### References

1. Furniss, B.S.; Hannaford, A.J.; Smith, P.W.; Tatchell, A.R. Vogel's Textbook of Practical, *Organic Chemistry*; Longman Scientific and Technical, Essex England, 1989; pp 1077–1078.
2. Blickenstaff, R.T.; Hanson, W.R.; Reddy, S.; Witt, R. Potential Radioprotective Agents-VI. Chalcones, Benzophenones, Acid Hydrazides, Nitro Amines and Chloro Compounds. Radioprotection of Murine Intestinal Stem Cells. *Bioorg. Med. Chem.* **1995**, *3*, 917–922.
3. Available at : [https://www.chemicalbook.com/ProductChemicalPropertiescb3406135\\_EN.htm](https://www.chemicalbook.com/ProductChemicalPropertiescb3406135_EN.htm).

4. Yale, H.L.; Losee, K.; Martins, J.; Holsing, M.; Perry, F.M.; Bernstein, J. Chemotherapy of Experimental Tuberculosis. VIII. The Synthesis of Acid Hydrazides, Their Derivatives and Related Compounds. *J. Amer. Chem. Soc.* **1953**, *75*, 1933–1942.
5. Saha, A.; Kumar, R.; Kumar, R.; Devakumar, C. Development and Assessment of Green Synthesis of Hydrazides. *Ind. J. Chem.* **2010**, *49B*, 526–531.
6. Kaushik, D.; Khan, S.A.; Chawla, G.; Kumar, S. N'-[(5-Chloro-3-Methyl-1-Phenyl-1H-Pyrazol-4-Yl)Methylene] 2/4-Substituted Hydrazides: Synthesis and Anticonvulsant Activity. *Eur. J. Med. Chem.* **2010**, *45*, 3943–3949.
7. Dimmock, J.R.; Padmanilayam, M.P.; Puthucode, R.N.; Nazarali, A.J.; Motaganahalli, N.L.; Zello, G.A.; Quail, J.W.; Oloo, E.O.; Kraatz, H.B.; Prisciak, J.S.; et al. A Conformational and Structure-Activity Relationship Study of Cytotoxic 3,5-Bis(Arylidene)-4-Piperidones and Related N-Acryloyl Analogues. *J. Med. Chem.* **2001**, *44*, 586–593.
